# Supplementary material for: Surface protein profiling of prostate-derived extracellular vesicles by mass spectrometry and proximity assays
Source: PubMed Central journal article supplement (PMC9780212; doi:10.1038/s42003-022-04349-x), 2022-12-22
Supplement: 42003_2022_4349_MOESM2_ESM.pdf [file 42003_2022_4349_MOESM2_ESM.pdf]

# Surface protein profiling of prostate-derived extracellular vesicles by mass spectrometry and proximity assays

**Ehsan Manouchehri Doulabi<sup>1</sup>‡, Claudia Fredolini<sup>1</sup>‡, Radiosa Gallini<sup>1</sup>, Liza Löf<sup>1</sup>, Qiu Jin Shen<sup>1</sup>,  
Ryoyo Ikebuchi<sup>1,2</sup>, Louise Dubois<sup>3</sup>, Alireza Azimi<sup>1</sup>, Olivier Loudig<sup>4</sup>, Susanne Gabrielsson<sup>5</sup>, Ulf  
Landegren<sup>1</sup>, Anders Larsson<sup>3</sup>, Jonas Bergquist<sup>6</sup> and Masood Kamali-Moghaddam<sup>1\*</sup>**

<sup>1</sup>Department of Immunology, Genetics & Pathology, Science for Life Laboratory, Uppsala University, Uppsala, Sweden.

<sup>2</sup>JSPS Overseas Research Fellow, Japan Society for the Promotion of Science, Japan.

<sup>3</sup>Department of Medical Sciences, Clinical Chemistry, Uppsala University, Uppsala, Sweden.

<sup>4</sup>Center for Discovery and Innovation, Hackensack Meridian Health, New Jersey, USA.

<sup>5</sup>Division of Immunology and Allergy, Department of Medicine, Karolinska Institutet, Solna, Sweden.

<sup>6</sup>Department of Chemistry-BMC, Analytical Chemistry, Uppsala University, Uppsala, Sweden.

‡ These authors contributed equally to this work

\*To whom correspondence should be addressed. Email: masood.kamali@igp.uu.se

**a**

Total lysate SF-sEVs 1414

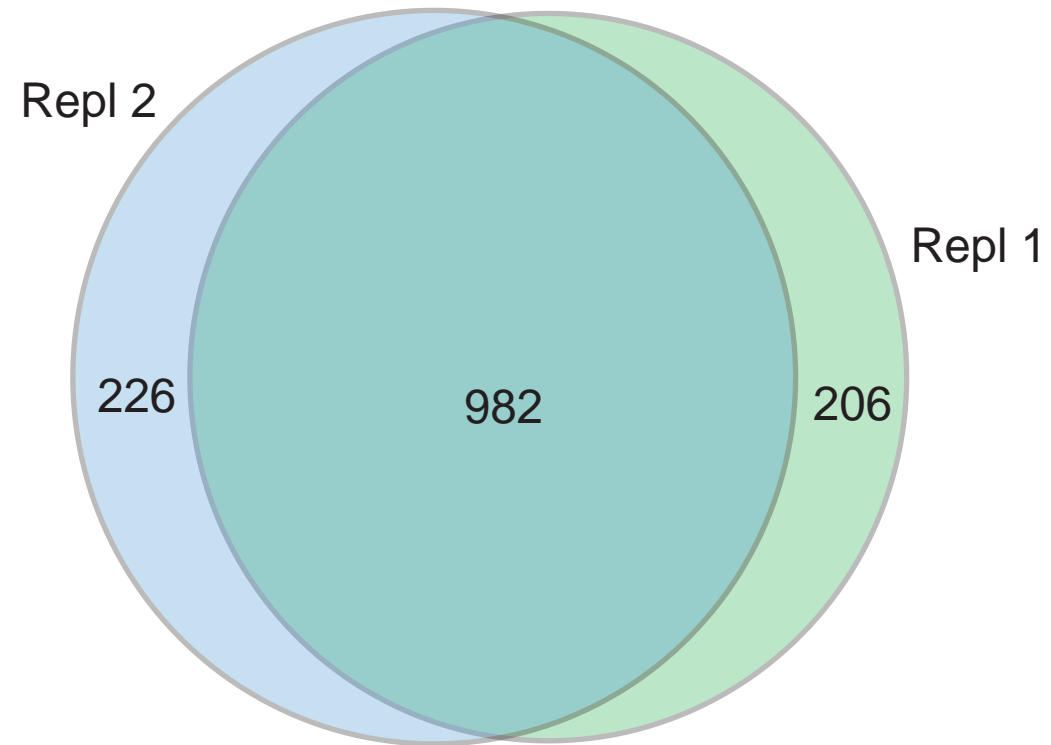**b**

Total minus Surface SF-sEVs 1460

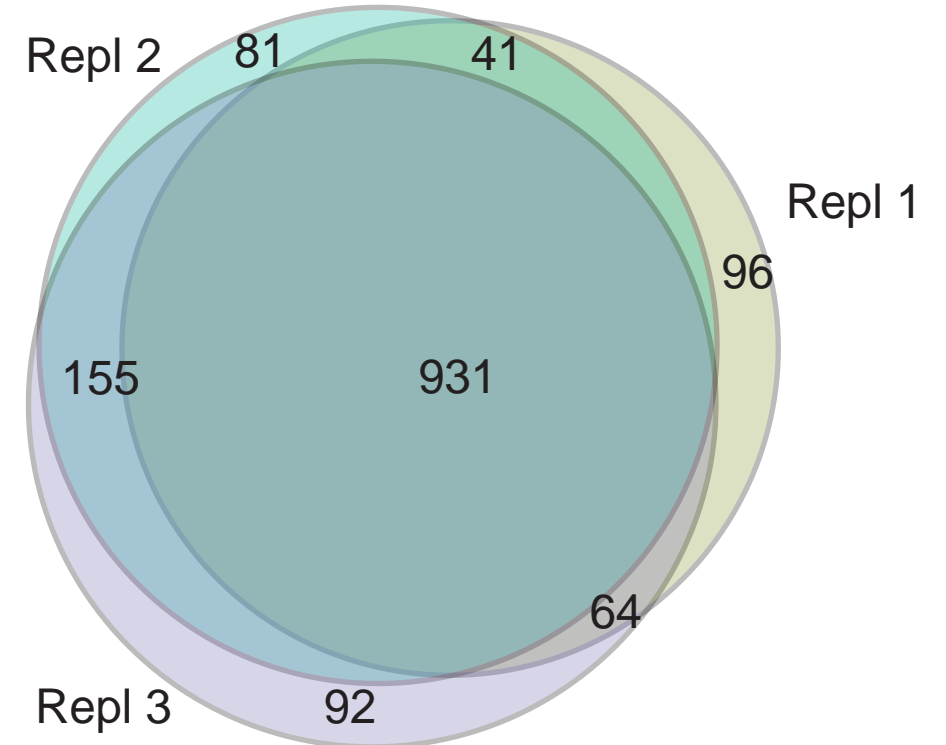**c**

Surface SF-sEVs 1014

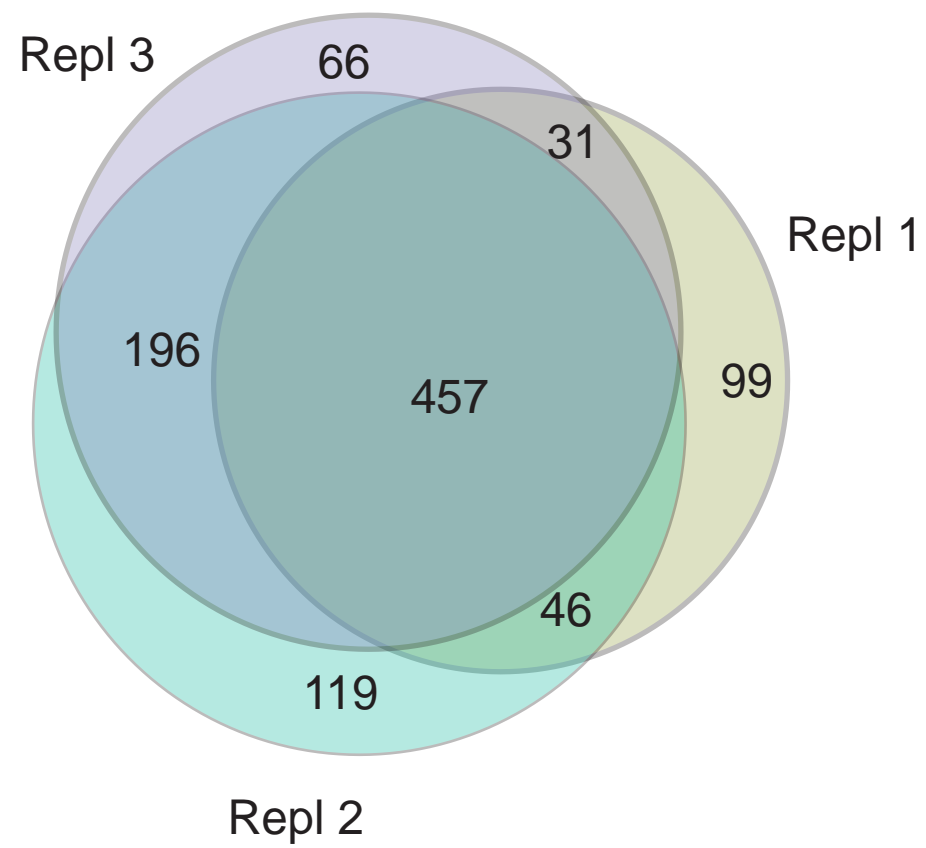

**Supplementary Figure 1. Reproducibility of identified proteins.**

Proportional area Venn diagrams of identified SF-sEVs proteins in (a) two replicates samples of Total lysate and three replicates samples of (b) Total-Surface and (c) Surface.

**a**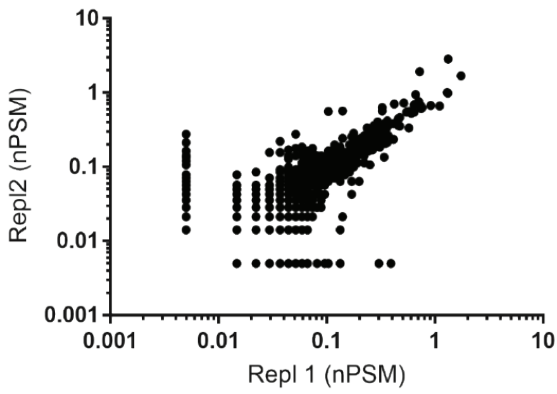**b**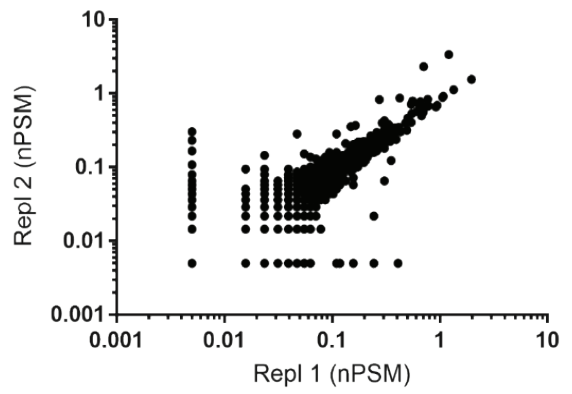**c**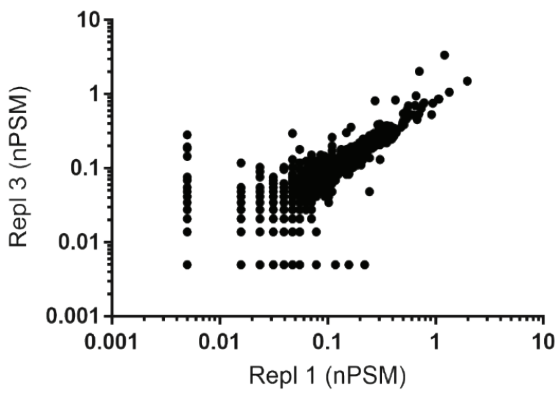**d**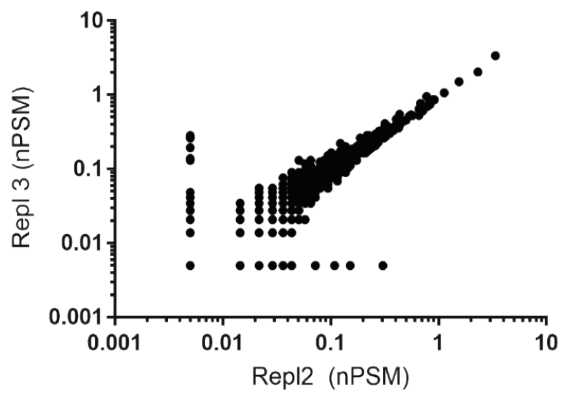**e**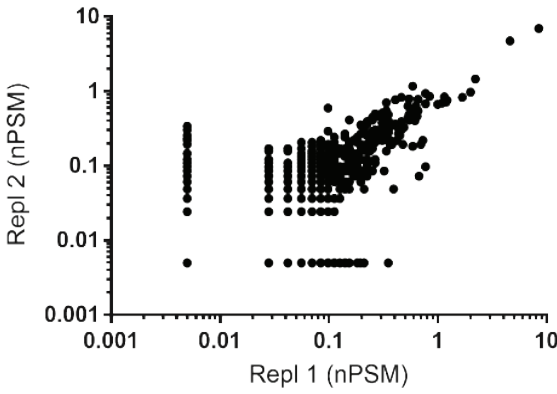**f**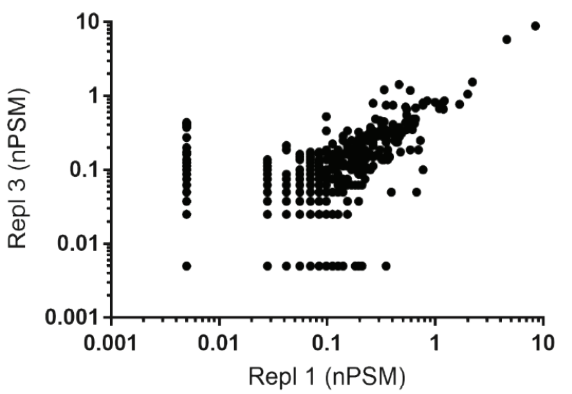**g**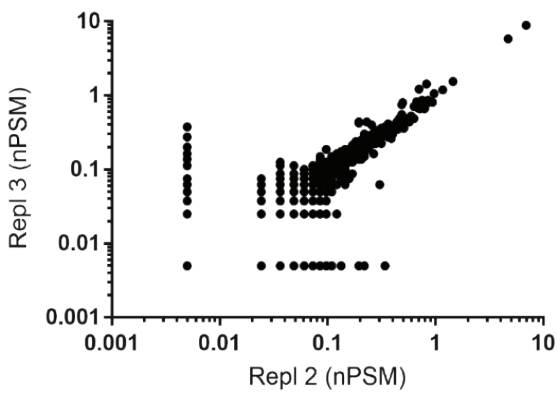

**Supplementary Figure 2. Reproducibility of numbers of protein identifications.**

Correlation between relative protein abundance (nPSMs) in replicates SF-sEVs samples of “Total lysate” (a), “Total minus Surface” (b, c, d) and “Surface” (e, f, g). Pearson’s  $r$  were respectively: (a) 0.872; (b) 0.836 (c) 0.846; (d) 0.985; (e) 0.953; (f) 0.948; (g) 0.986.

a

-  Immune System
-  Male reproductive system
-  Disease

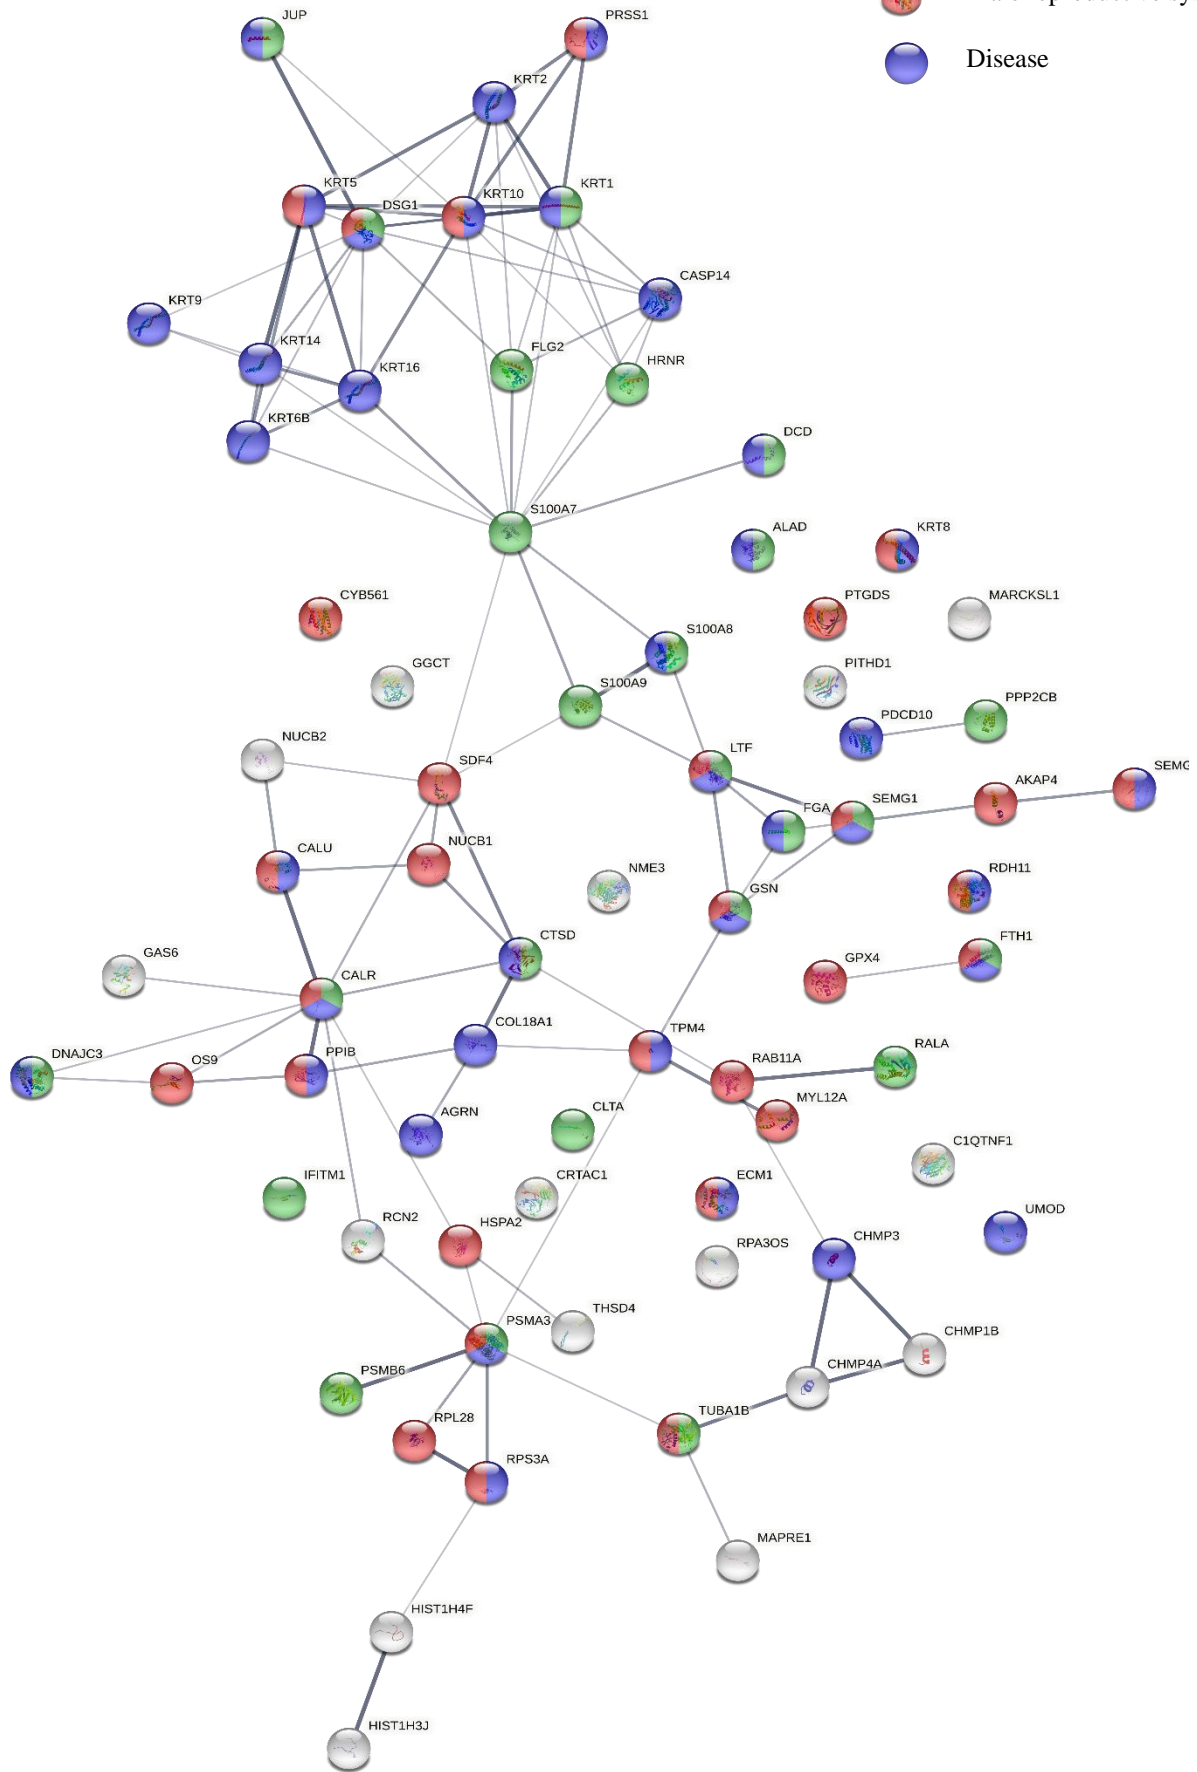

b

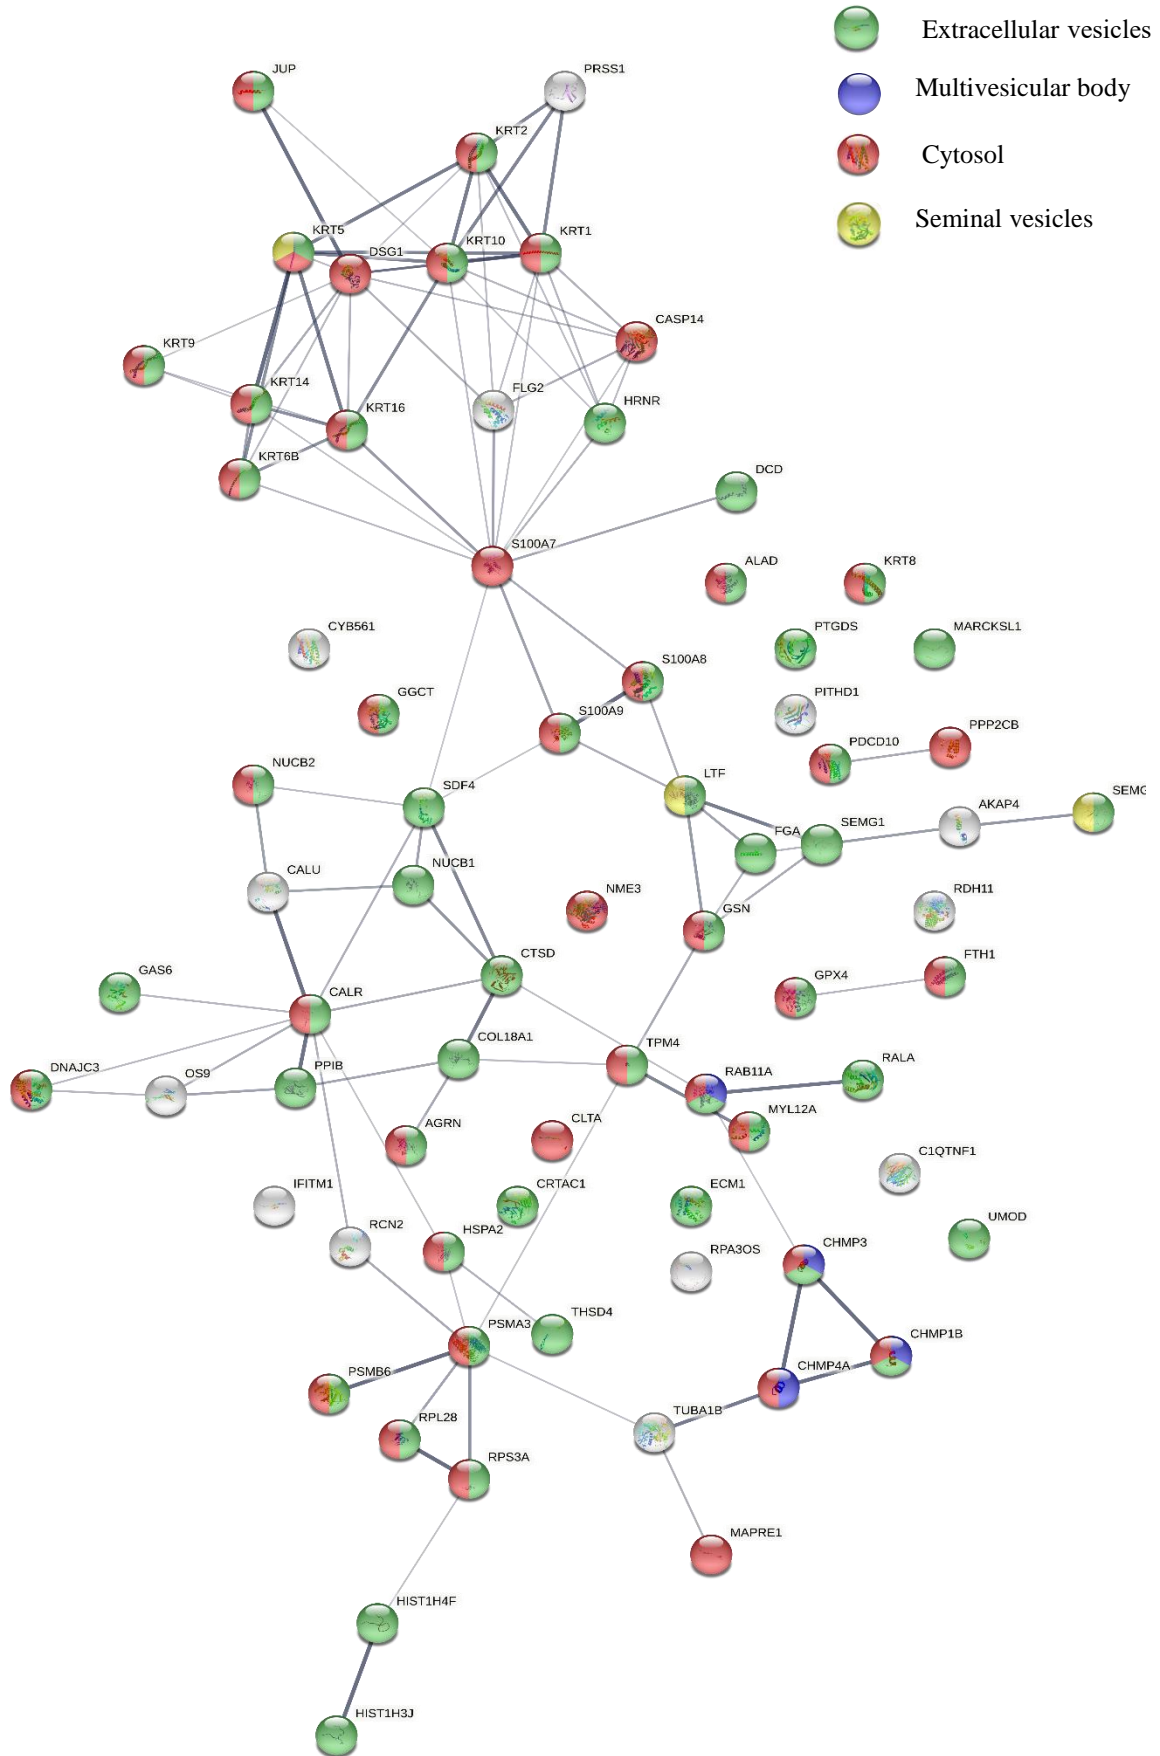

### **Supplementary Figure 3. String Graph.**

The location and functional roles of the 74 Surface enriched proteins were analyzed using the STRING database. The analysis was based on seven different criteria; a) 1) play roles in immune system, 2) any putative function in male reproductive system, and 3) putative involvement in emerging of diseases. b) presence in 4) extracellular vesicles, 5) multivesicular bodies, 6) cytosol and 7) seminal vesicles. White colored dot indicates that a protein is not existed in any of selected options.



a

### Cellular Component (CC)

#### Total minus Surface

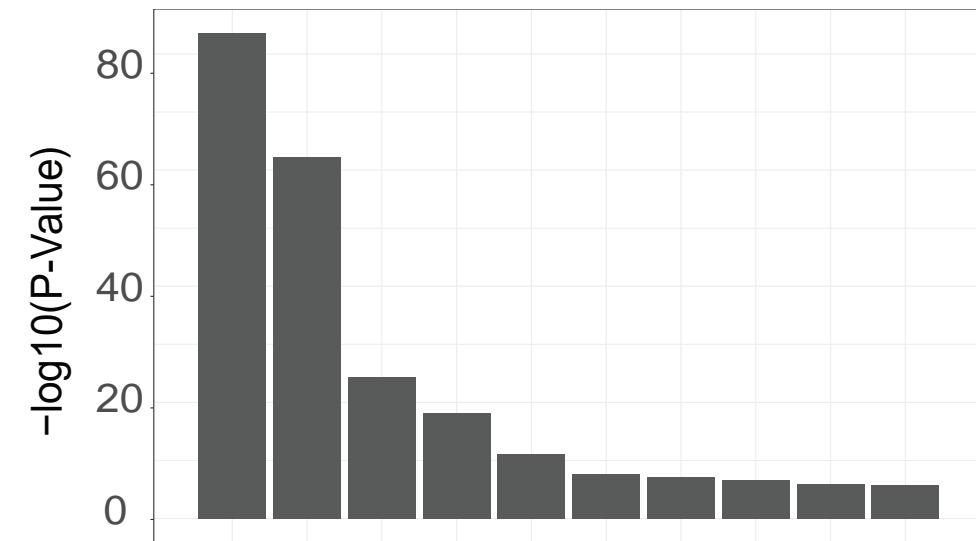

#### Surface

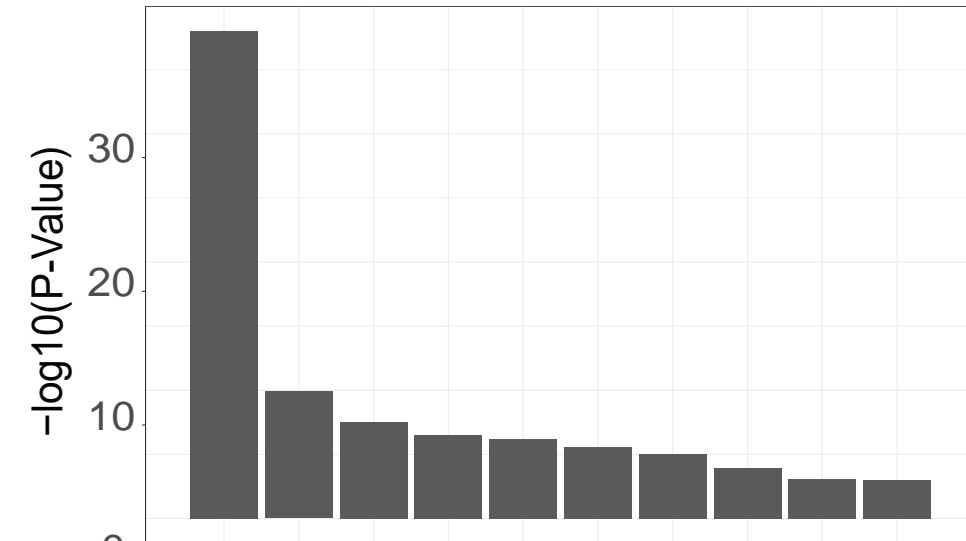

b

### Molecular Function (MF)

#### Total minus Surface

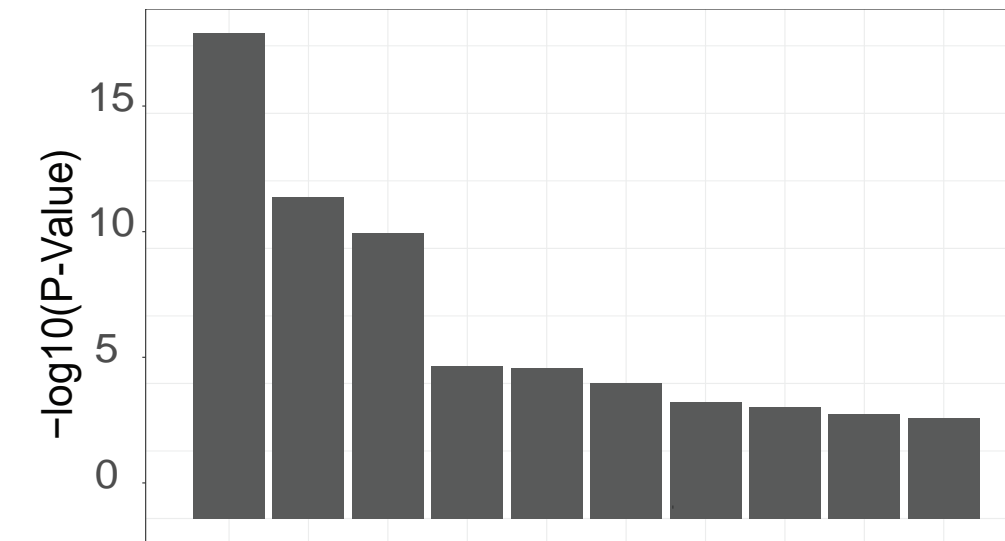

#### Surface

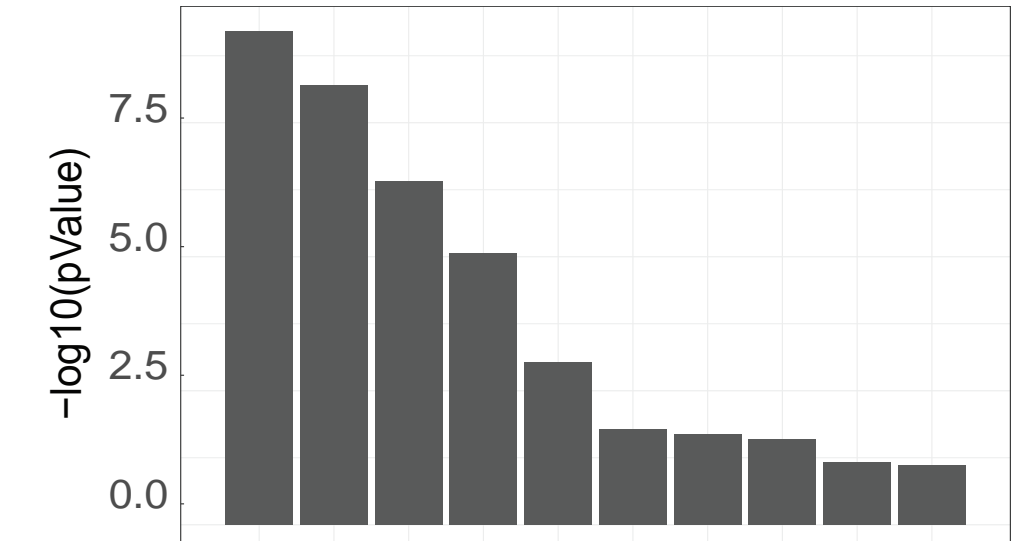

GO:0098641-cadherin binding involved in cell-cell adhesion  
 GO:0008565-protein transporter activity  
 GO:0016787-hydrolase activity  
 GO:0008536-Ran GTPase activity  
 GO:0003774-Ran GTPase activity  
 GO:0005525-motor activity  
 GO:000146-microfilament motor activity  
 GO:0016301-kinase activity  
 GO:0005509-calcium ion binding  
 GO:0005198-structural molecule activity  
 GO:0005515-structural constituent of cytoskeleton  
 GO:0050786-RAGE-protein binding  
 GO:0035662-Toll-like receptor binding  
 GO:0050544-arachidonic acid binding  
 GO:0042277-peptide binding  
 GO:0002020-protease binding  
 GO:0051082-unfolded protein binding

c

### Biological Process (BP)

#### Total minus Surface

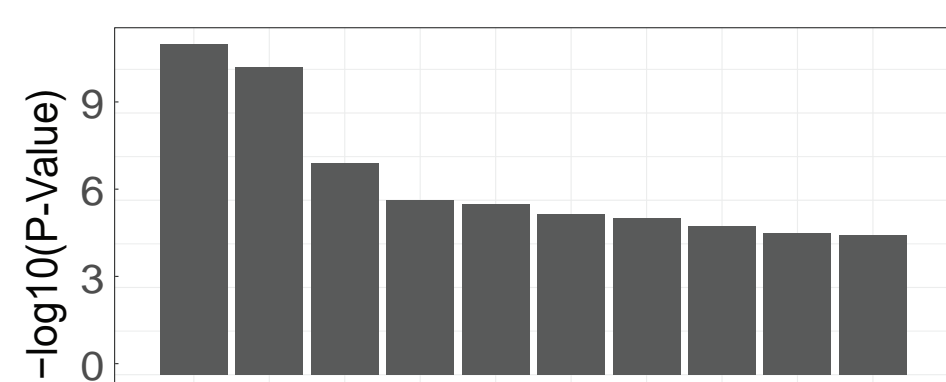

#### Surface

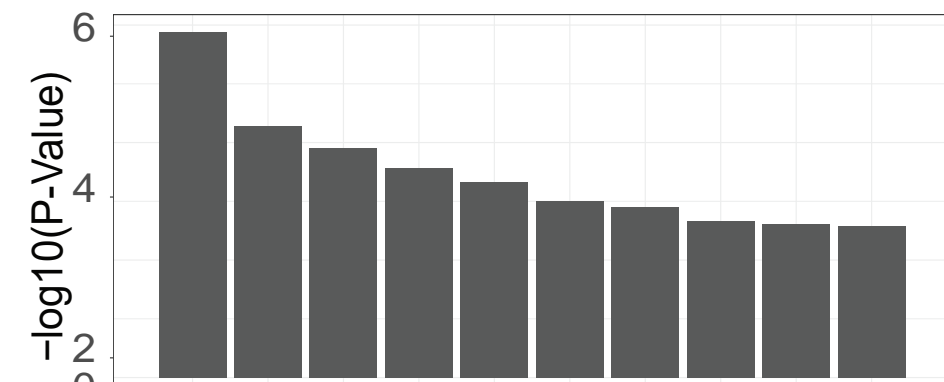

GO:0006886-intracellular protein transport  
 GO:0098609-cell-cell adhesion  
 GO:0015031-protein transport  
 GO:0006413-translational transport  
 GO:0016032-viral process  
 GO:0006418-tRNA aminoacylation for protein translation  
 GO:000184-nuclear-transcribed mRNA catabolic process  
 GO:0016241-regulation of macroautophagy  
 GO:0008544-epidermis development  
 GO:0061436-establishment of skin barrier  
 GO:044267-cellular protein metabolic process  
 GO:0036258-multivesicular body assembly  
 GO:007080-mitotic metaphase  
 GO:0031424-keratinization  
 GO:0051258-protein polymerization  
 GO:000920-cell separation after cytokinesis  
 GO:0051291-protein heterooligomerization

**Supplementary Figure 4. DAVID functional Gene Ontology analysis.**

Proteins identified in the SF-sEVs fractions “Total minus Surface” and “Surface” were analyzed using DAVID Bioinformatics resources online. Enrichment analysis was performed for (a) cellular component (b) molecular function and (c) biological process. The top ten statistically significant biological terms are identified for each sample category.

**a**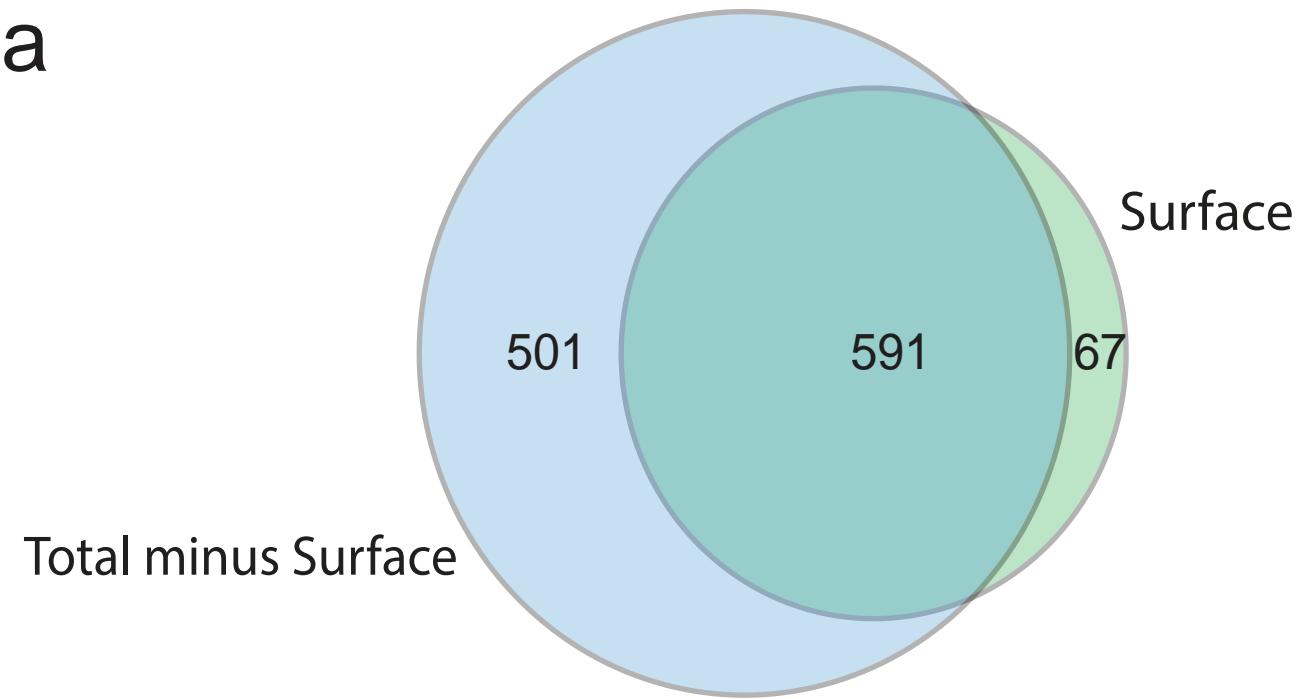**b**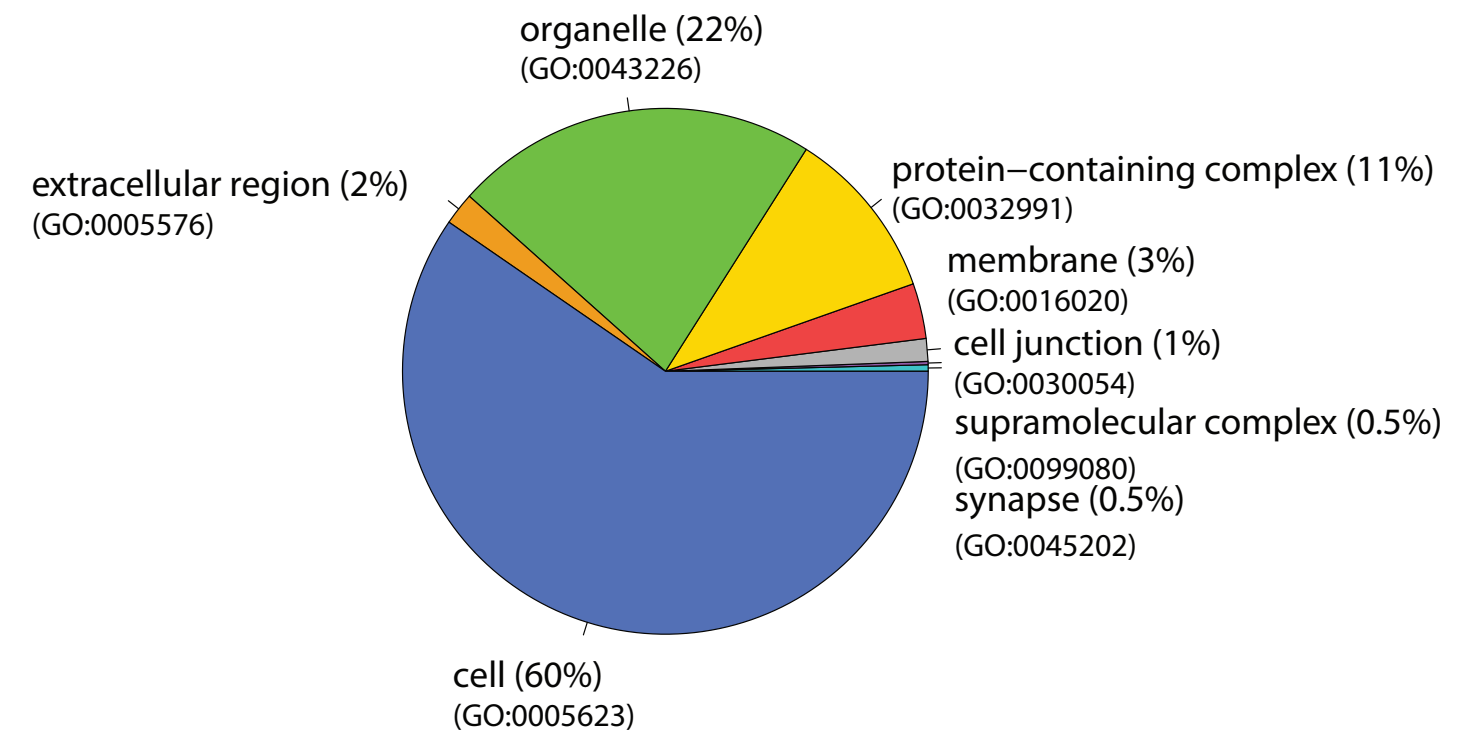**c**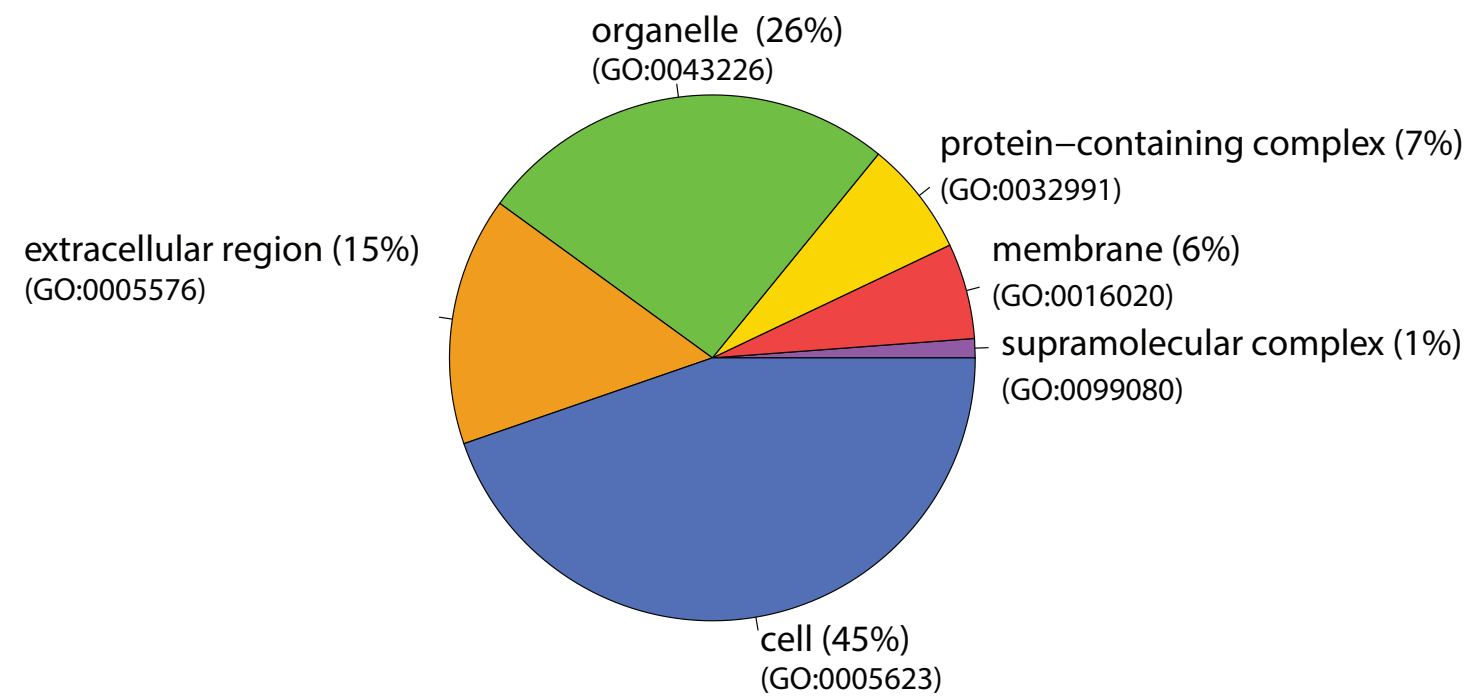**d**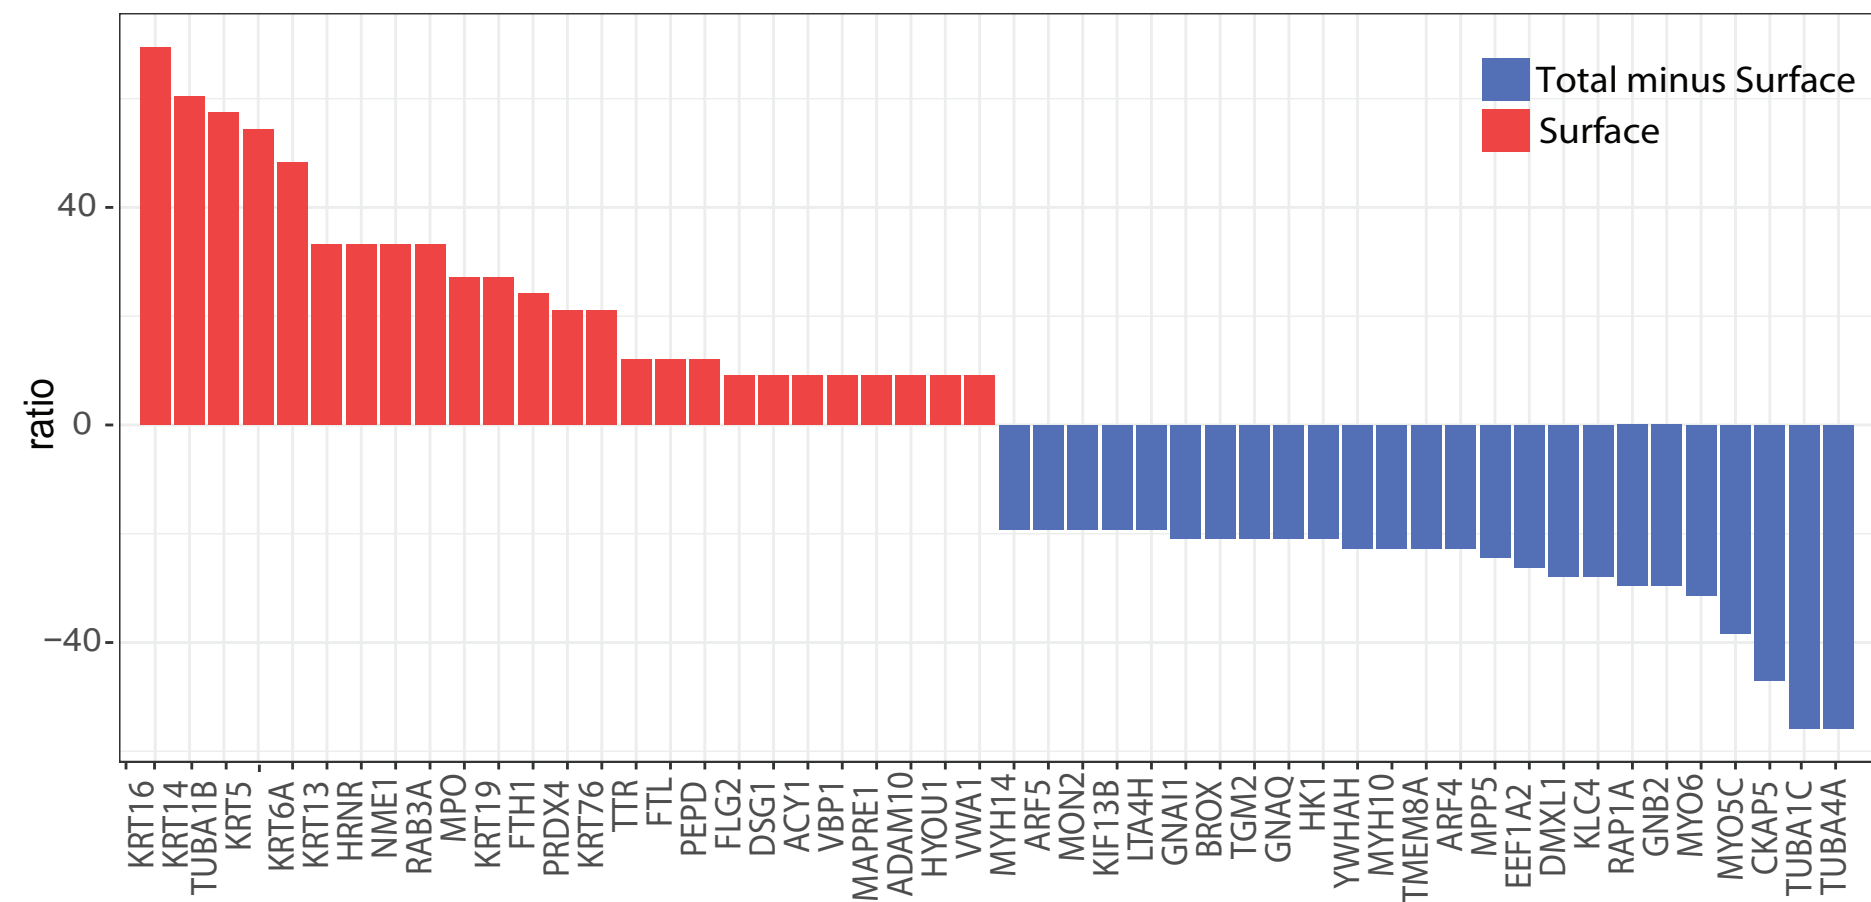

**Supplementary Figure 5. Protein expression in PC3 sEVs.**

(a) Proportional area Venn diagram representation of proteins identified in “Surface” and “Total minus Surface” fractions. GO-CC categories of proteins enriched in (b) “Total minus Surface” and (c) “Surface” of PC3 sEVs. (d) Bar plot representing the ratio of the 25 most enriched proteins in “Surface” and in “Total minus Surface.”

**a**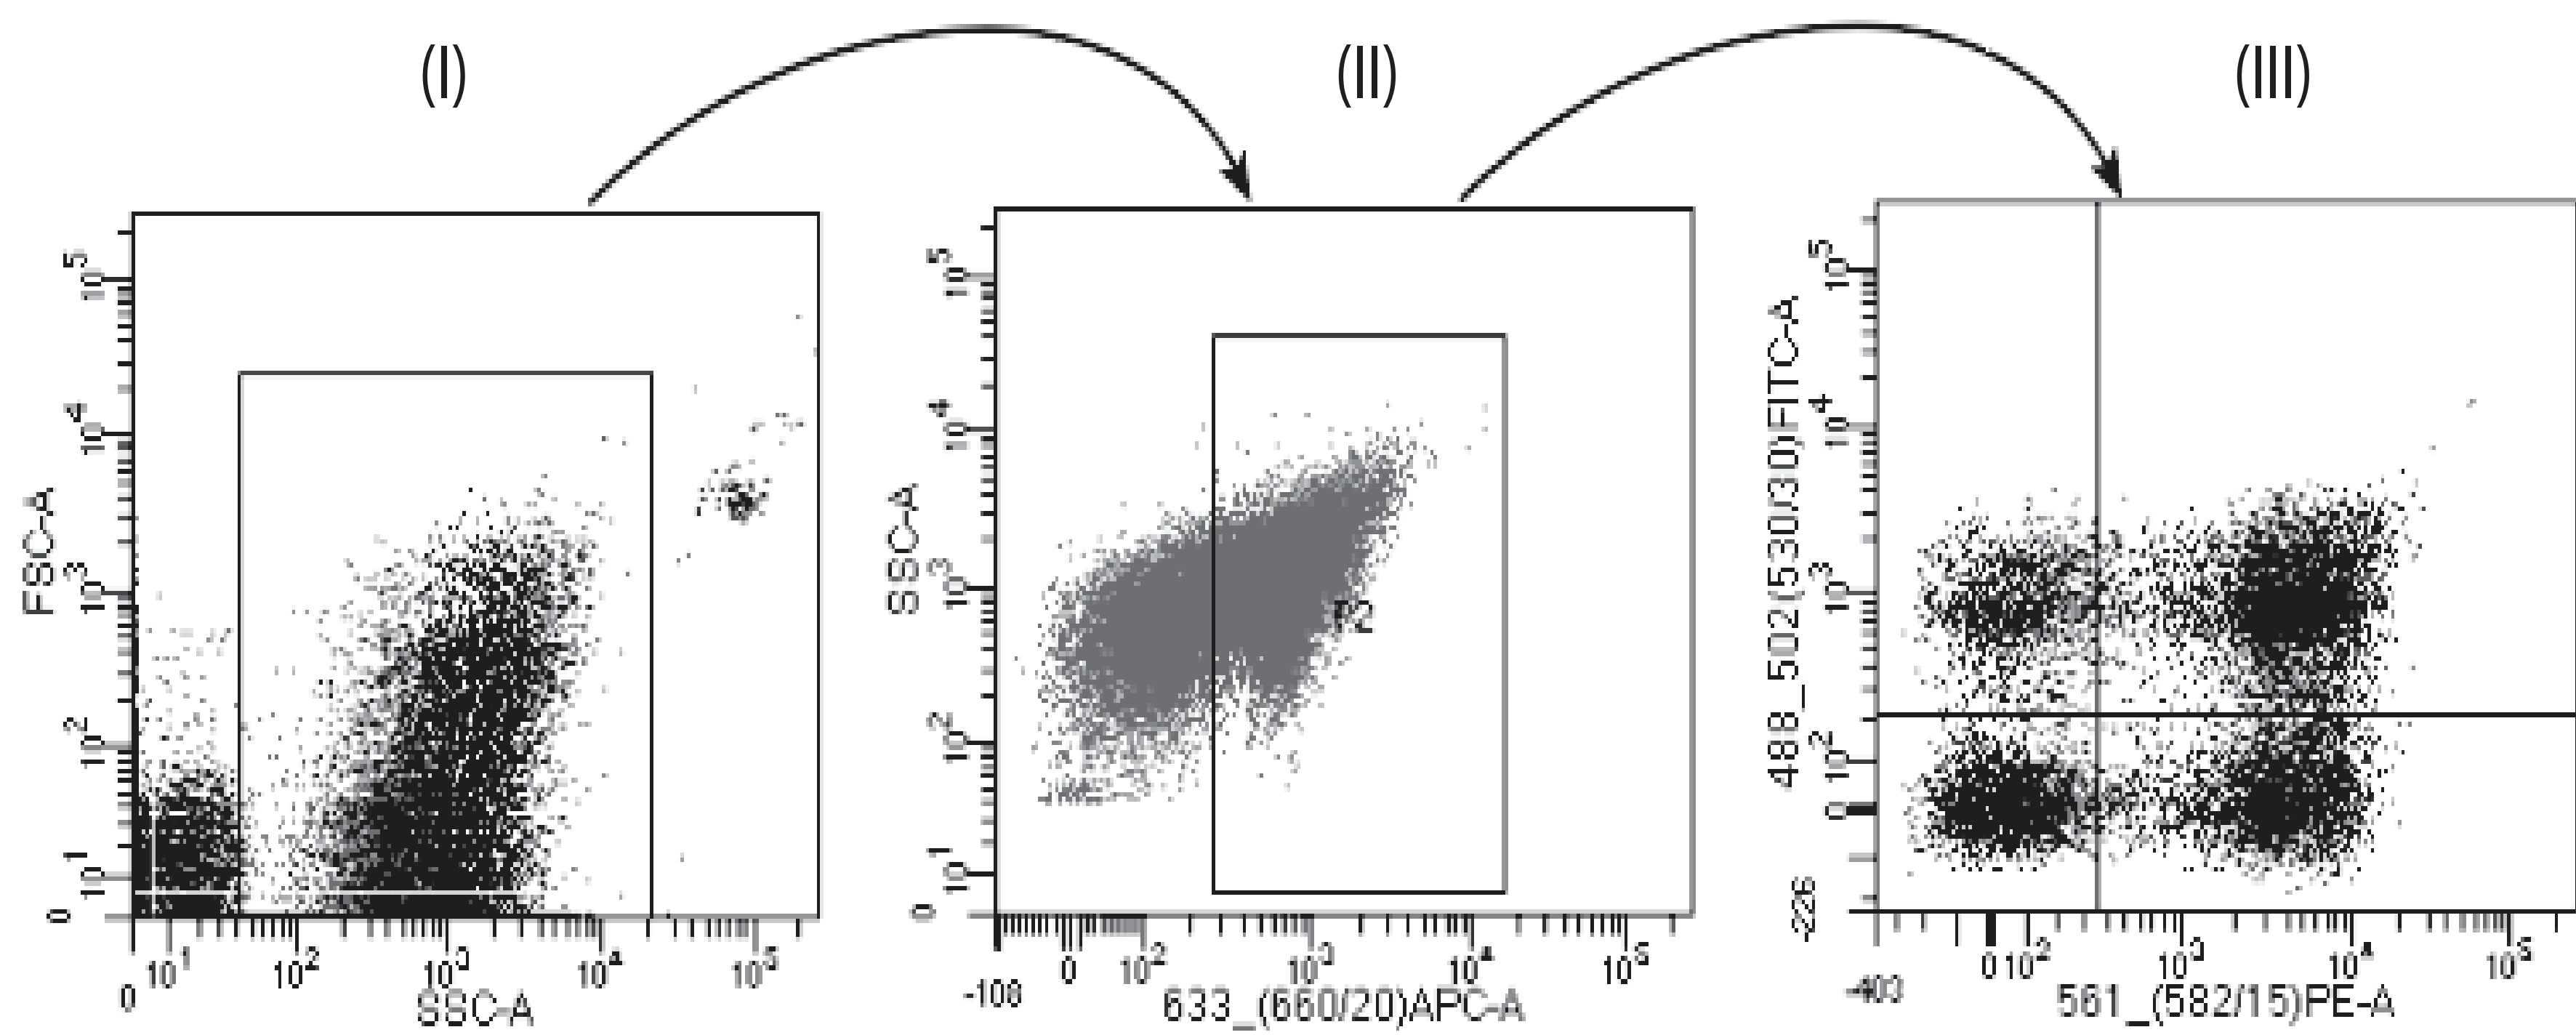**b**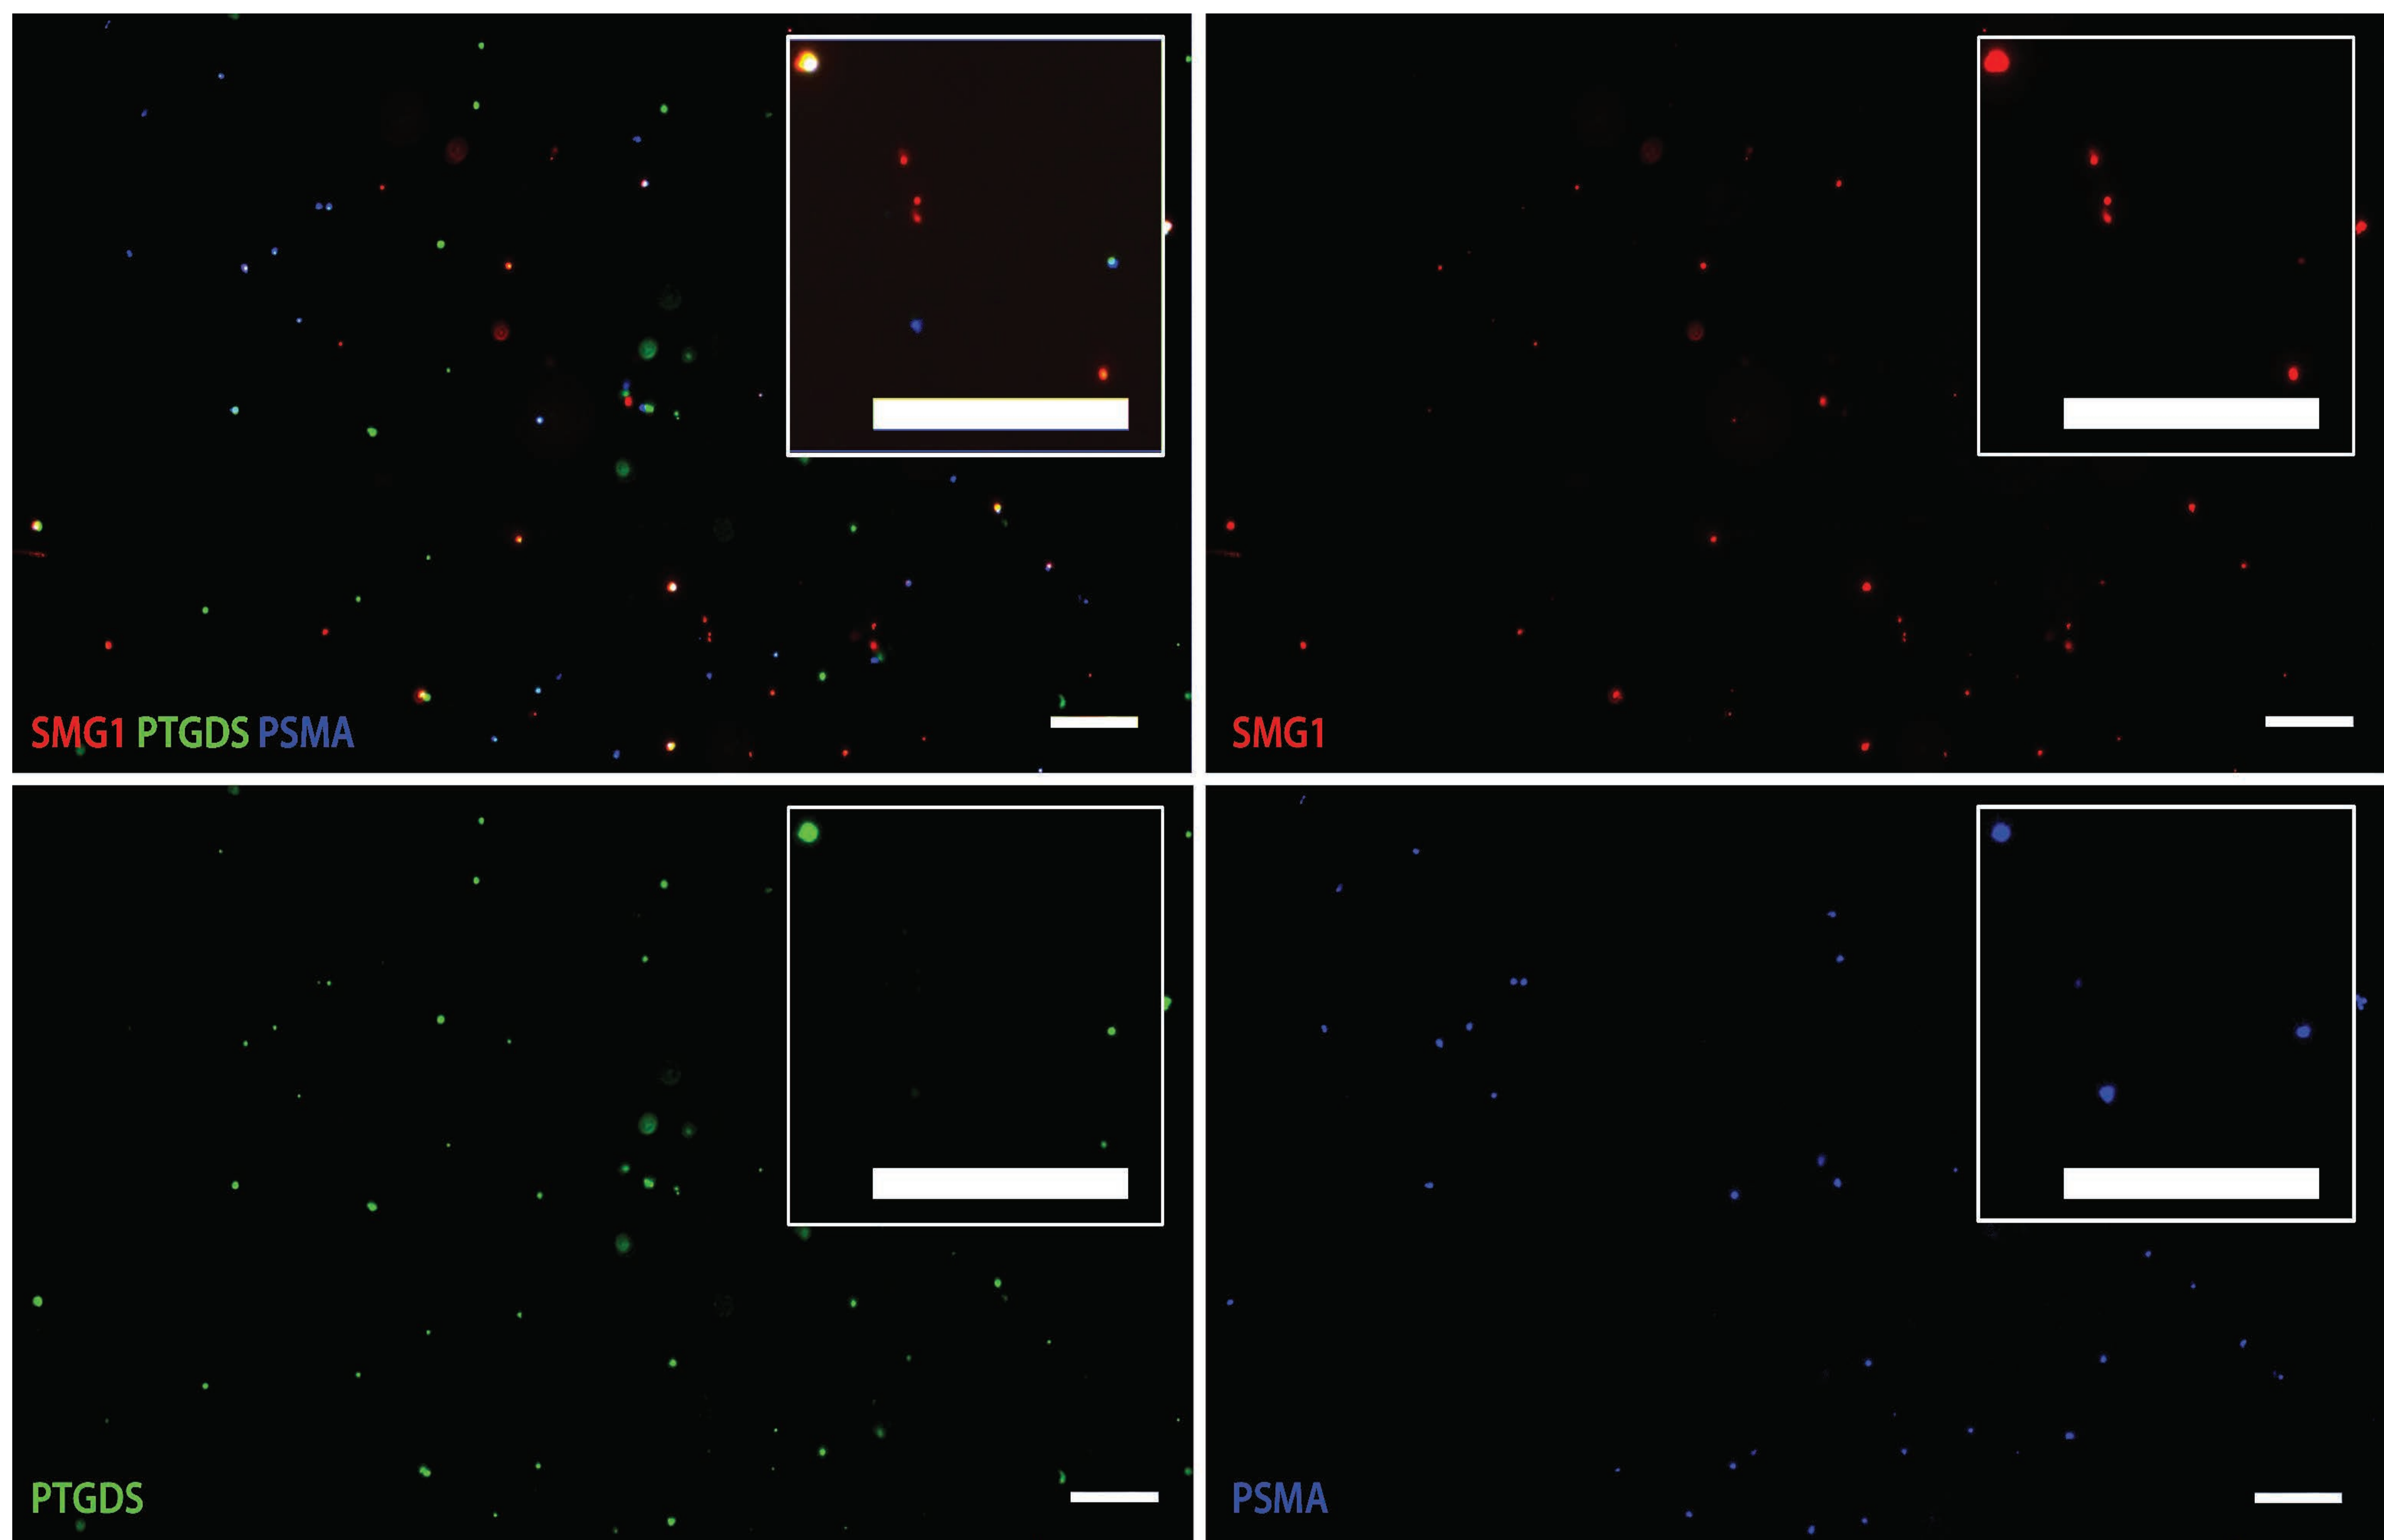

**Supplementary Figure 6. Exo-PLA gating strategy to identify labeled sEVs.**

(a) Gating of sEVs carrying RCA products; I: a gate was set around all sEVs positive for RCA products with the use of FSC/SSC and a PBS control. II: next, a gate was set around the APC positive sEVs. III: identification of the population of sEVs positive for the most abundant marker on the target sEV, followed by identifying different populations of sEVs, FITC<sup>-</sup>PE<sup>-</sup>, FITC<sup>+</sup>PE<sup>-</sup>, FITC<sup>-</sup>PE<sup>+</sup>, FITC<sup>+</sup>PE<sup>+</sup>. In this example of gating strategy APC identifies populations positive and negative for CD59, FITC and PE identify populations positive and negative for ACP and PSMA, respectively. (b) Confirmation of positive signals by fluorescence microscopy. The images show single and triple combinations for SMG1, PTGDS and PSMA markers on single sEVs. Scale bars 20 μm

CD9 ~26kDa

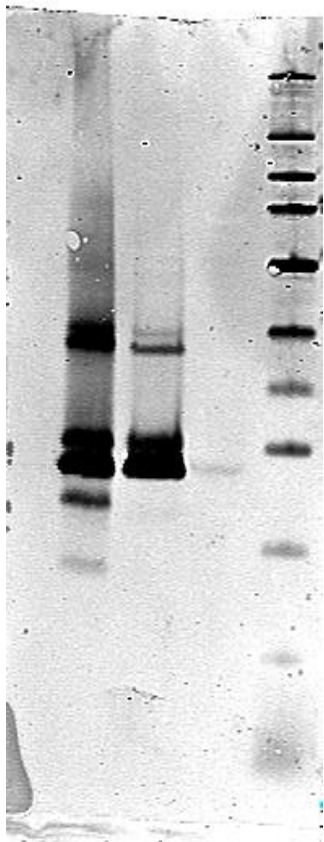

SF-sEVs  
PC3 sEVs  
PC3 cells

CD63 ~48kDa

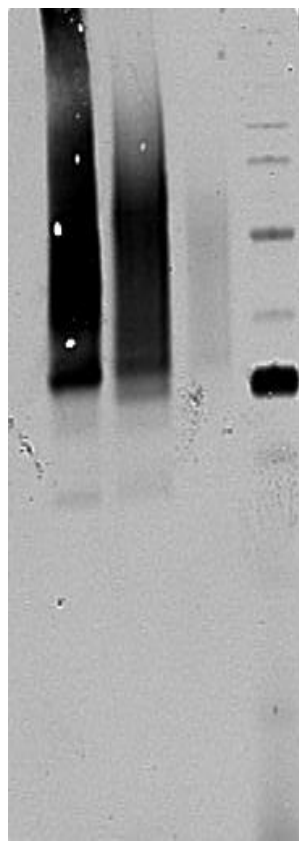

SF-sEVs  
PC3 sEVs  
PC3 cells

CD81 ~20- 25 kDa

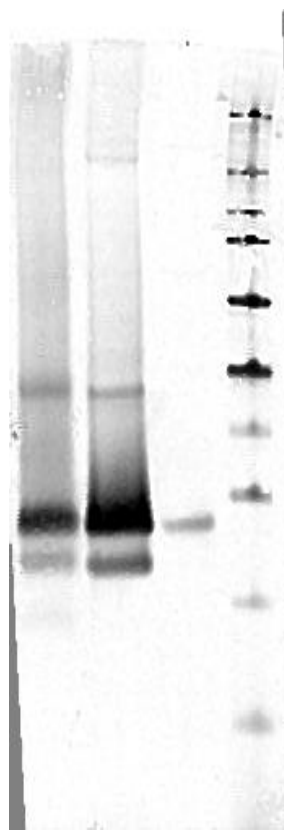

SF-sEVs  
PC3 sEVs  
PC3 cells

TSG101 ~47kDa

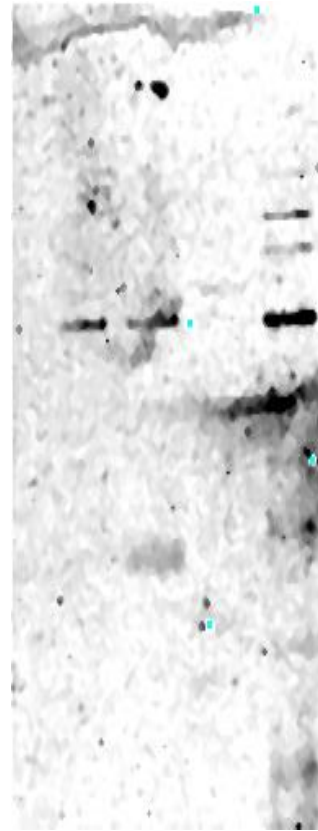

SF-sEVs  
PC3 sEVs  
PC3 cells

Calnexin ~67kDa

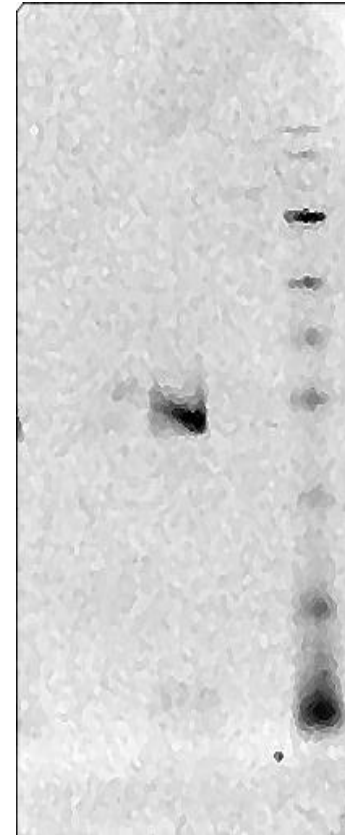

SF-sEVs  
PC3 sEVs  
PC3 cells

**Supplementary Figure 7. Uncropped and unedited blot western blot of seminal fluid and PC3 sEVs.**

**Uncropped and unedited western blot results for sEV markers CD9, CD63, CD81, TSG-101 and the ER marker calnexin was targeted as a negative control.**



**Supplementary Table 1.** List of antibodies used in ExoPLA, SP-PLA and Western blot

| <b>Antibodies name</b>       | <b>Target</b>                                    | <b>coloonality</b> | <b>Cat.No</b> | <b>Company</b>        |
|------------------------------|--------------------------------------------------|--------------------|---------------|-----------------------|
| anti-human CD9               | motility-related protein-1 (MRP-1) CD9           | mAb                | MAB1880-100   | R&D Systems           |
| anti-human CD63              | type III lysosomal glycoprotein CD63             | mAb                | 556019        | BD Biosciences        |
| anti-human CD81              | human CD81                                       | mAb                | MAB4615       | R&D Systems           |
| anti-human CD26              | Dipeptidyl peptidase-4 (DPP4) CD26               | mAb                | MAB1180       | R&D Systems           |
| anti-human CD13              | Aminopeptidase N                                 | mAb                | MCA1270EL     | AbD Serotec           |
| anti-human ACP               | prostatic acid phosphatase                       | mAb                | MAB6240       | R&D Systems           |
| anti-human TSG101            | Tumor Susceptibility gene 101 protein            | mAb                | GTX70255      | GeneTex               |
| anti-human GAPDS             | Glyceraldehyde-3-phosphate dehydrogenase         | mAb                | H00026330-M01 | Abnova                |
| anti-human PSMA              | prostate-specific membrane antigen               | mAb                | ab19071       | Abcam                 |
| anti-human Calnexin          | Calnexin                                         | mAb                | ab232433      | Abcam                 |
| anti-human CD9 biotinylated  | motility-related protein-1 (MRP-1) CD9           | mAb                | 13-0098-82    | eBioscience           |
| anti-human CD10              | Nepriylsin                                       | pAb                | AF1182        | R&D Systems           |
| anti-human PSA               | Prostate-specific antigen or kallikrein-3 (KLK3) | pAb                | AF1344        | R&D Systems           |
| anti-human CD59              | CD59 glycoprotein                                | pAb                | AF1987        | R&D Systems           |
| anti-human PTGDS             | prostaglandin D2                                 | pAb                | orb107421     | Biorbyt               |
| anti-human AKAP 82           | A-kinase anchor protein 4                        | pAb                | GTX31595      | Gene Tex              |
| anti-human SEMG1             | Semenogelin I                                    | pAb                | ABIN630160    | antibodies-online.com |
| anti-human CRISP1            | Cysteine-rich secretory protein 1                | pAb                | HPA028445     | ATLAS ANTIBODIES      |
| anti-human CD26 biotinylated | Dipeptidyl peptidase-4                           | pAb                | BAF1180       | R&D Systems           |
| Secondary IRDye 680LT        | donkey anti-mouse                                |                    | 926-68022     | LI-COR                |
| Secondary IRDye 800CW        | donkey anti-rabbit                               |                    | 926-32213     | LI-COR                |

Supplementary Table 2. List of oligonucleotides used in ExoPLA and SP-PLA

| Name of oligos                        | DNA Sequence ( 5` to 3`)                                           | Modification            | Company                   |
|---------------------------------------|--------------------------------------------------------------------|-------------------------|---------------------------|
| General PLA probe oligonucleotide     | GACGCTAATAGTTAAGACGCTT                                             | 5' Azide                | Integrated DNA Technology |
| PLA probe oligonucleotide 1           | AAAAAAAAAATATGACAGAACATACGGTCTCGCAGATCGCTTAGACACTCTT               | 5' Azide                | Integrated DNA Technology |
| PLA probe oligonucleotide 2           | AAAAAAAAAATATGACAGAACGGACGATCATCCAGCACTAGTAGACACTCTT               | 5' Azide                | Integrated DNA Technology |
| PLA probe oligonucleotide 3           | AAAAAAAAAATATGACAGAACCGGGCGACATAAGCAGATACTAGACACTCTT               | 5' Azide                | Integrated DNA Technology |
| Tag-specific 1                        | AGCGATCTGCGAGACCGTAT                                               | 5'phosphate             | Integrated DNA Technology |
| Tag-specific 2                        | CTAGTGCTGGATGATCGTCC                                               | 5'phosphate             | Integrated DNA Technology |
| Tag-specific 3                        | GTATCTGCTTATGTCGCCCG                                               | 5'phosphate             | Integrated DNA Technology |
| Circulation oligonucleotide short     | GTTCTGTCATATTTAAGCGTCTTAA                                          | 5'phosphate             | Integrated DNA Technology |
| Circulation oligonucleotide long      | CTATTAGCGTCCAGTGAATGCGAGTCCGTCTAAGAGAGTAGTACAGCAGCCGTC AAGAGTGTCTA | 5'phosphate             | Integrated DNA Technology |
| Tag-specific detection                | AGCGATCTGCGAGACCGTATUUUU                                           | 5'-APC                  | Integrated DNA Technology |
| Tag-specific detection                | CTAGTGCTGGATGATCGTCCUUUU                                           | 5'-FITC                 | Integrated DNA Technology |
| Tag-specific detection                | GTATCTGCTTATGTCGCCGUUUU                                            | 5'-PE                   | Integrated DNA Technology |
| Release UNG digestion oligonucleotide | AAAAACGAUUCGAGAACGUGACUGCCAUGCCAGCUCGUACU AUCGAATAATCGTACCCT       | 5'Azide                 | Integrated DNA Technology |
| Release UNG digestion oligonucleotide | CGAUAGUACGAGCUGGCAUGGCAGUCACGUUCUGAAUCGUUUU                        | 5'Biotin                | Integrated DNA Technology |
| SLC1                                  | CGCATCGCCCTTGACTACGACTGACGAACCGCTTTGCCTGACTGATCGCTAAATCGTG         | streptavidin-conjugated | TriLink BioTechnologies   |
| SLC2                                  | TCGTGTCTAAAGTCCGTTACCTTGATTCCCCTAACCTCTTGAAAAATTCGGCATCGGTGA       | streptavidin-conjugated | TriLink BioTechnologies   |
