# Supplementary material for: Surface protein profiling of prostate-derived extracellular vesicles by mass spectrometry and proximity assays
Source: PubMed Central journal article supplement (PMC9780212; doi:10.1038/s42003-022-04349-x), 2022-12-22
Supplement: 42003_2022_4349_MOESM3_ESM.pdf [file 42003_2022_4349_MOESM3_ESM.pdf]

## Description of Additional Supplementary Files

**File name:** Supplementary Data 1

**Description:** A complete list of proteins identified across all the fractions for SF-sEV, PC3 sEVs and PC3 cell lysate (The source data underlying Figures 3 and 4 and Supplementary Figures 1, 2, 4 and 5)

**File name:** Supplementary Data 2

**Description:** List of proteins enriched in the surface of SF-sEVs. Only proteins identified in at least two replicates and with a ratio > 2 were included. (The source data underlying Supplementary Figure 3)

**File name:** Supplementary Data 3

**Description:** Functional descriptions for The 74 surface enriched proteins
